# Supplementary material for: Childhood adversity and deliberate self-poisoning in Sri Lanka: a protocol for a hospital-based case–control study
Source: PubMed Central journal article supplement (PMC6701561; doi:10.1136/bmjopen-2018-027766), 2019-08-18
Supplement: bmjopen-2018-027766.draft_revisions.pdf [file bmjopen-2018-027766.draft_revisions.pdf]

# BMJ Open

BMJ Open is committed to open peer review. As part of this commitment we make the peer review history of every article we publish publicly available.

When an article is published we post the peer reviewers' comments and the authors' responses online. We also post the versions of the paper that were used during peer review. These are the versions that the peer review comments apply to.

The versions of the paper that follow are the versions that were submitted during the peer review process. They are not the versions of record or the final published versions. They should not be cited or distributed as the published version of this manuscript.

BMJ Open is an open access journal and the full, final, typeset and author-corrected version of record of the manuscript is available on our site with no access controls, subscription charges or pay-per-view fees (<http://bmjopen.bmj.com>).

If you have any questions on BMJ Open's open peer review process please email [info.bmjopen@bmj.com](mailto:info.bmjopen@bmj.com)

# BMJ Open

## Childhood adversity and deliberate self-poisoning in Sri Lanka: a protocol for a hospital-based case-control study

|                               |                                                                                                                                                                                                                                                                                                                                                                                                                                                |
|-------------------------------|------------------------------------------------------------------------------------------------------------------------------------------------------------------------------------------------------------------------------------------------------------------------------------------------------------------------------------------------------------------------------------------------------------------------------------------------|
| Journal:                      | <i>BMJ Open</i>                                                                                                                                                                                                                                                                                                                                                                                                                                |
| Manuscript ID                 | bmjopen-2018-027766                                                                                                                                                                                                                                                                                                                                                                                                                            |
| Article Type:                 | Protocol                                                                                                                                                                                                                                                                                                                                                                                                                                       |
| Date Submitted by the Author: | 06-Nov-2018                                                                                                                                                                                                                                                                                                                                                                                                                                    |
| Complete List of Authors:     | Knipe, Duleeka; University of Bristol, School of Social and Community Medicine<br>Bandara, Piimee; Western Sydney University, Translational Health Research Institute,<br>Senarathna, Lalith; University of Peradeniya, South Asian Clinical Toxicology Research Collaboration, Faculty of Medicine<br>Kidger, Judi; Univ Bristol,<br>López-López, José; Univ of Bristol,<br>Rajapakse, Thilini; University of Peradeniya, Faculty of Medicine |
| Keywords:                     | Suicide & self-harm < PSYCHIATRY, childhood adversity, domestic violence, low and middle income countries                                                                                                                                                                                                                                                                                                                                      |
|                               |                                                                                                                                                                                                                                                                                                                                                                                                                                                |

SCHOLARONE™  
Manuscripts

1  
2  
3 **Childhood adversity and deliberate self-poisoning in Sri Lanka: a protocol for a hospital-based case-**  
4 **control study**  
5

6 Duleeka Knipe<sup>1,2</sup>, Piamee Bandara<sup>3</sup>, Lalith Senarathna<sup>2,4</sup>, Judi Kidger<sup>1</sup>, José A López-López<sup>1</sup>, Thilini  
7 Rajapakse<sup>5</sup>  
8

9 **Affiliations**

10 1. Population Health Sciences, Bristol Medical School, University of Bristol, Canynge Hall, 39 Whatley  
11 Road, Bristol BS8 2PS, UK

12 2. South Asian Clinical Toxicology Research Collaboration (SACTRC), Faculty of Medicine, University of  
13 Peradeniya, Peradeniya, Sri Lanka

14 3. Translational Health Research Institute, Western Sydney University, Sydney, Australia

15 4. Department of Health Promotion, Faculty of Applied Sciences, Rajarata University, Anuradhapura,  
16 Sri Lanka

17 5. Department of Psychiatry, Faculty of Medicine, University of Peradeniya, Peradeniya, Sri Lanka  
18  
19

20 **Word count**

21 Manuscript = 2672  
22  
23

24 **Corresponding author address:**

25 Duleeka Knipe

26 Population Health Sciences

27 Canynge Hall 2.12

28 Whatley Road

29 Bristol

30 BS8 2PS, UK

31 Tel. +44117 3314574

32 E [Dee.Knipe@bristol.ac.uk](mailto:Dee.Knipe@bristol.ac.uk)  
33  
34  
35  
36  
37  
38  
39  
40  
41  
42  
43  
44  
45  
46  
47  
48  
49  
50  
51  
52  
53  
54  
55  
56  
57  
58  
59  
60

## ABSTRACT

### Introduction:

Childhood adversity (CA) has been suggested as a key risk factor for suicidal behaviour, but evidence from low and middle-income countries (LMIC) is lacking. In Sri Lanka, CA, in the form of child maltreatment or as a consequence of maternal separation, has been highlighted in primarily qualitative or case-series work as a potentially important determinant of suicidal behaviour. To date, there have been no quantitative studies to investigate CA as a key exposure associated with suicidal behaviour in Sri Lanka. The aim of the research is to understand the association between CA and suicidal behaviour in Sri Lanka and to identify potentially modifiable factors to reduce any observed increased risk of suicidal behaviour associated with CA.

### Methods and analysis:

This is a hospital-based case-control study. Cases (n=200) will be drawn from individuals admitted to the medical toxicology ward of the Teaching Hospital Peradeniya (THP), Sri Lanka for medical management of intentional self-poisoning. Sex and age frequency matched controls (n=200) will be recruited from either patients or accompanying visitors presenting at the outpatient department and clinic of the same hospital for conditions unrelated to the outcome of interest. Conditional logistic regression will be used to investigate the association between CA and deliberate self-poisoning and whether the association is altered by other key factors including socio-economic status, psychiatric morbidity, current experiences of domestic violence and social support.

### Ethics and dissemination:

Ethics approval has been obtained from the Ethical Review Committee of the Faculty of Medicine, University of Peradeniya, Sri Lanka. Researchers have been trained in administering the questionnaire and a participant safety and distress protocol has been designed to guide researchers in ensuring participant safety and how to deal with a distressed participant. Results will be disseminated in local policy fora and peer-reviewed articles, local media, and national and international conferences.

## ARTICLE SUMMARY

### Strengths and limitations of this study

- This is the first quantitative study to determine the association of childhood adversity and intentional self-harm in Sri Lanka.
- This study will help identify potentially modifiable risk factors to inform the design of interventions and policies to reduce suicidal behaviour in the Sri Lankan context.
- Internationally validated instruments for the assessment of childhood adversity, depression, alcohol use and domestic violence and pretested forms for the assessment of other variables of interest are used.
- Hospital control outpatients may have a different exposure distribution compared to the base-population, introducing the potential for selection bias.
- The reported rate of abuse (childhood and current) may be underestimated due to cultural stigma and recall issues.

## INTRODUCTION

Suicide is a significant cause of mortality resulting in approximately 800,000 deaths per year globally, 39% of which occur in the WHO region of South-East Asia.<sup>1</sup> WHO estimates suggest that cases of non-fatal self-harm occur at least 20 times more frequently than the number of suicides.<sup>2</sup> In the last few decades, Sri Lanka, a middle-income country in South Asia, has experienced significant variations in its suicide rate, reaching its peak in 1995 of 47.0 per 100,000.<sup>3,4</sup> In response to the magnitude of this public health issue, a Presidential Task Force on Suicide Prevention was established in 1997, whose actions included decriminalising suicidal acts and restricting the availability of pesticides, the most common means of suicide in Sri Lanka.<sup>5</sup> Although reported rates of suicide have declined over the past two decades, studies of trends in intentional self-harm suggest that incidence of non-fatal intentional self-harm is increasing, especially among young people.<sup>6,7</sup> A better understanding of the risk factors for suicide and self-harm in these settings is essential for developing informed suicide prevention policies.

Childhood adversity (CA) has been suggested as a key risk factor for suicidal behaviour<sup>8</sup>, but evidence from low and middle-income countries (LMIC) is lacking. Adverse childhood experiences may comprise acts of physical, sexual, emotional abuse as well as emotional and physical neglect and witnessing domestic violence.<sup>9,10</sup> It has been estimated that 30% of the risk of mental disorders in LMICs is attributable to CA,<sup>11</sup> and evidence from high income countries (HIC) reports that CA is a significant risk factor for suicidal behaviour.<sup>8,12</sup> However, the challenges faced in LMICs are likely to be different, as parental mortality is much higher and the rise in temporary labour migration has resulted in millions of children growing up with one or both parents absent, disrupting parental ties and family structures.<sup>13</sup> In Sri Lanka, CA, in the form of child maltreatment (e.g. domestic violence), or as a consequence of maternal separation, has been highlighted in primarily qualitative or case-series work as a significant contributor for suicidal behaviour.<sup>14,15</sup> To date, there have been no quantitative studies to investigate CA as a key exposure associated with suicidal behaviour in Sri Lanka, nor how CA might be associated with suicidal behaviour in the presence of other established socio-demographic and psychiatric risk factors. Current epidemiological evidence is lacking and is urgently needed as Sri Lanka formulates its suicide prevention activities.

The aim of this research is to investigate the association between CA and suicidal behaviour in Sri Lanka, and to identify potentially modifiable factors to reduce any increased risk of suicidal behaviour associated with CA (see Figure 1 – Hypothesised conceptual model of self-harm). The results from this study will help inform the design of appropriate interventions to reduce the number of preventable suicide deaths in this country and thereby also reduce the number of individuals bereaved by suicide.

## METHODS AND ANALYSIS

### Study setting

The study will be carried out in the Teaching Hospital Peradeniya (THP), located in the Kandy District, Central Province of Sri Lanka. Kandy District has a total population of 1,375,382 and is 115 km east from Colombo, the capital of Sri Lanka.<sup>16</sup> The THP is a tertiary referral hospital with a catchment area that includes the North Central, North Western and Sabaragamuwa Provinces.

### Study design

An individually matched hospital-based case-control design will be used in this study. Cases will be drawn from individuals admitted to the medical toxicology ward (ward 17) of the THP (Sri Lanka) for medical management of intentional self-poisoning. This case definition excludes self-harm due to other methods, for example cutting; however self-poisoning represents the most common method of self-harm cases presenting to hospital in Sri Lanka.<sup>17-19</sup>

1  
2  
3  
4 Sex and age frequency matched controls will be drawn from patients and accompanying visitors  
5 presenting to the outpatient department of the THP. Outpatients typically present with conditions  
6 such as cough, chest infection, hypertension, pregnancy and diabetes related complications,  
7 conditions unrelated to the outcome of interest for this study.<sup>20</sup> Visitors and patients attending the  
8 nearby outpatient clinic for specialist care treatment and management will also be recruited.  
9

### 10 **Inclusion and exclusion criteria**

11 All patients aged 18 years and over, admitted to the study site (ward 17, THP) during the 6-month  
12 study period, for medical management of intentional self-poisoning, will be considered for inclusion  
13 in the study as a case. Patients and visitors attending the outpatient department and specialist clinics  
14 of the THP will be considered for recruitment as controls. All participants will be provided with the  
15 participant information sheet and will sign a consent form prior to being enrolled into the study.  
16  
17

18 Patients who are physically unable or too unwell to participate in the study interview prior to discharge  
19 from hospital, and those already diagnosed with an intellectual disability or dementia, will be excluded  
20 from the study. Those admitted for management of accidental poisoning will not be recruited.  
21 Controls with a previous self-harm episode will not be excluded from the study but this information  
22 will be recorded.  
23  
24

### 25 **Sample size**

26 The estimated monthly case admission for intentional self-poisoning within ward 17 is approximately  
27 100 cases per month. With the aim of collecting 50% of cases per month, we plan to recruit 200 cases  
28 in total and 200 age and sex frequency matched controls over a 6-month time period. Assuming 20%  
29 of controls report a history of CA (odds=0.25), a 2-fold difference in risk will be detectable with 86%  
30 power ( $\alpha = 0.05$ ).<sup>21,22</sup>  
31  
32

### 33 **DATA COLLECTION**

34 The study is expected to recruit participants over a 6-month period. Interviews will be conducted by  
35 trained data collectors in the participant's preferred language (Sinhala, Tamil or English). Interviewers  
36 are not blinded to the case or control status of the participant, and in order to limit any interviewer  
37 bias the interviewers will be given a standard script which they were requested to follow regardless  
38 of case status. The supervisor (PB) will regularly shadow interviewers to ensure that the interviewers  
39 adhered to the script.  
40  
41  
42

43 Given the nature of the physical layout of the ward and outpatient department, and the sensitivity of  
44 the questions, interviews will only be conducted with the participant if they are able to accompany  
45 the data collector to a designated confidential space nearby, for interview. This ensures that the  
46 interview can be conducted in private and in the absence of accompanying friends or family members.  
47 Interviews will be conducted during non-visiting hours for patients in ward 17 to ensure responses will  
48 not be influenced by another person and for patient safety.  
49  
50

### 51 **Questionnaires**

#### 52 **Main exposure**

53 The main exposure of interest in this study is childhood adversity. Childhood adversity data will be  
54 collected using the WHO Adverse Childhood Experiences International Questionnaire, a culturally  
55 adapted screening tool for childhood adversity.<sup>23</sup> The questionnaire is designed for administration to  
56 people over the age of 18. Questions cover family dysfunction; physical, sexual and emotional abuse  
57 and neglect by parents or caregivers; peer violence; witnessing community violence, and exposure to  
58  
59  
60

collective violence. The English questionnaire has been translated, back-translated and previously piloted into the two local languages.

In addition to the questions included in the WHO questionnaire, participants will be asked pretested questions about their experiences of parental (mother/father) absence due to temporary foreign migration during the first 18 years of life.

#### Confounders and other study factors

Demographic data will be collected using a pretested questionnaire. Data on age, sex, ethnicity, religion, marital status, residential area, household composition, parenting status (i.e. presence and number of children and age of youngest child) will be collected. Employment status will also be ascertained, and a description of participant occupation will be defined based on the following categories, 'elementary occupation', 'armed forces', 'craft or related trades worker', 'skilled agricultural worker', 'service worker', 'technician', 'small business holder', 'big business holder', 'professional', 'manager/legislator/administration'.

For socioeconomic position, data will be collected on individual educational attainment, parental education and motorised vehicle ownership (a proxy measure of household socioeconomic position). For individual and parental educational attainment, participants will be asked to select the highest completed level of education from the following categories, 'no schooling', 'completed between grades 1-5', 'completed between grades 6-10', 'passed ordinary level', 'passed advanced level', 'completed university/postgraduate qualifications'. For motorised vehicle ownership, participants will be asked if they own a motorbike, three-wheeler vehicle, car/van, tractor, and/or a bus.

Information on the type of poison ingested for the current self-harm episode will be collected based on the following categories: 'medicinal overdose', 'pesticide ingestion', 'plant poison', 'petroleum-based products', 'rat poison', 'other household chemical', or 'other'. Where possible, participants will be asked to specify the name of the poison ingested.

Data on past self-harm behaviour, including if the participant has previously self-harmed or if they know of a close friend or family member who has self-harmed or died by suicide will also be collected. Past psychiatric morbidity (i.e. diagnosed with a mental disorder) and whether or not the participant experiences existing comorbidities, such as chronic illness and physical disabilities, will also be collected.

Data on current psychiatric morbidity will also be collected. Participants will be asked to complete the 9-item Patient Health Questionnaire (PHQ-9). The PHQ-9 is a brief, one-page self-administered questionnaire, that is internationally validated for assessing the severity of depression. The PHQ-9 has been translated and validated for use in the Sinhala-speaking Sri Lankan population.<sup>24</sup> The translated questionnaire has previously been used in the National Mental Health Survey of Sri Lanka for both Sinhala and Tamil populations.<sup>25</sup>

Information on alcohol use disorders will be collected, based on the Alcohol Use Disorders Identification Test (AUDIT), which has been developed by the WHO and also been validated for the local population,<sup>26</sup> and has been previously used in Sri Lanka. The AUDIT comprises questions related to the frequency and quantity of alcohol consumption and the effect of alcohol consumption on behaviour.

Participants will also be asked if they have learned about sexual and reproductive health rights through school and if the information delivered was useful. In addition, data on current exposure to domestic violence will be collected using a translated, back-translated and piloted version of the 4-question

1  
2  
3 HARK questionnaire.<sup>27</sup> The four short questions aim to capture different components of domestic  
4 violence, relating to emotional abuse, psychological abuse, sexual, and physical violence.  
5

6  
7 Finally, participants will also be asked questions relating to their social capital, including their  
8 emotional support networks and sense of belonging. The questions used in this survey are questions  
9 that have been used as part of a large social capital community survey in the North Central Province  
10 of Sri Lanka.<sup>28</sup> Questions are designed to capture whether participants are currently emotionally  
11 supported at the household and community levels and if they feel a sense of belonging. Information  
12 will also be collected on past social capital based on a sense of belonging at school, and interaction  
13 with peers and teachers.<sup>29,30</sup>  
14

### 15 **Analysis plan**

16 Conditional logistic regression techniques will be used to examine the association between CA and  
17 deliberate self-poisoning (outcome). In the primary analysis, CA will be quantified using the total score  
18 of the WHO Adverse Childhood Experiences International Questionnaire, and unadjusted associations  
19 with the outcome will be presented. Additionally, separate analyses will be conducted using questions  
20 about parental absence (a proxy for CA) and including both the WHO questionnaire and the questions  
21 about parental absence as separate covariates in the model to explore the partial association of each  
22 with the outcome.  
23

24  
25 The study will investigate the potential confounding effects of parental education, ethnicity and  
26 religion in a series of models. Potential confounders will be specified as covariates in models with  
27 measures of CA and parental absence as the main exposures of interest, following investigation of  
28 univariate associations between each potential confounder and self-harm. Additional key factors, such  
29 as current socio-economic status, marital and parental status, psychiatric morbidity, current  
30 experiences of domestic violence and social support, will also be incorporated to investigate potential  
31 effect measure changes. The statistical software Stata version 15<sup>31</sup> will be used for data analysis.  
32  
33

### 34 **ETHICS**

35  
36 Each participant will be given a verbal explanation of the study with a written information sheet and  
37 their permission to participate will be sought via written informed consent. Participants will be  
38 informed during their consent process that they have the right to withdraw at any time during or after  
39 the interview.  
40

41  
42 The study includes questions related to self-harm, CA and current domestic violence which may result  
43 in participant distress. A participant safety and distress protocol has been designed to guide  
44 researchers in ensuring participant safety and how to deal with a distressed participant. With regards  
45 to risk of self-harm, the protocol advises that if the participant reports experiencing suicidal thoughts  
46 daily during the preceding two weeks, they will be referred to the Psychiatry Clinic, THP held every  
47 Thursday for further management and follow up. Where project staff have reason to believe that the  
48 participant is at an immediate risk to themselves or others, the psychiatric on-call doctor will be  
49 notified. Participants are informed that they are eligible to withdraw from the study at any point, and  
50 that this will have no adverse effect on their medical or psychiatric management or follow up. All  
51 interviews will be conducted in a manner that ensures that the participants' usual medical treatment  
52 or care does not get delayed or adversely impacted due to study participation.  
53

54  
55 If during the completion of this questionnaire the participant discloses a child safeguarding issue (i.e.  
56 current sexual abuse of a child, under the age of 18), project staff will notify the principal investigator  
57 (DWK) and the local principal investigator (TR) will inform the National Child Protection Authority  
58 (NCPA), as appropriate. Participants will be informed during the consent process that such disclosures  
59  
60



1  
2  
3 will result in notification. The circumstances under which confidentiality would be broken will be  
4 explained to the participant during the informed consent process.  
5

6 Participants will be asked questions about domestic abuse, and if these questions are asked in the  
7 presence of the perpetrator of that abuse or other family members this may have adverse outcomes  
8 for the participant. In recognition of this risk, the interview will only be conducted in private during  
9 non-visiting hours and in a private location in the hospital. If current domestic abuse is disclosed, the  
10 participant will be offered information about help available locally and if appropriate, the patient will  
11 also be offered a referral to the psychiatry clinic.  
12  
13

## 14 **DISSEMINATION**

15  
16 Findings from this research will be published academically in peer-reviewed articles and will also be  
17 given publicity in the local media. Findings may also be disseminated at national and international  
18 conferences, health symposia and local policy fora, for example, local government and non-  
19 government agencies. Any participant who is interested can also receive a copy of the report of the  
20 research and the outcomes from the investigators.  
21  
22

## 23 **Acknowledgements**

24 The authors would like to thank the senior academics who have acted as advisors for the study:  
25 Professor David Gunnell; Professor Gene Feder; Professor Chris Metcalfe (University of Bristol),  
26 Professor Michael Eddleston, (University of Edinburgh), and Professor Flemming Konradsen  
27 (University of Copenhagen). The authors thank Professor Andrew Page (Western Sydney University),  
28 for his valuable feedback on the manuscript. The authors also thank the staff at SACTRC, in particular,  
29 Indunil Abeyratne and Chamil Kumara for their support in setting up the study. In addition, the authors  
30 would like to acknowledge the significant contribution of the data collection team Kasuni Silva,  
31 Tharuka Silva, Sandareka Samarakoon and Azra Aroos, and the staff on ward 17 and OPD of the  
32 Teaching Hospital Peradeniya for accommodating this research.  
33  
34  
35

## 36 **Competing interests**

37 None declared.  
38

## 39 **Funding statement**

40 This work is supported by UK Medical Research Council (grant number MC\_PC\_MR/R019622/1), and  
41 the Elizabeth Blackwell Institute for Health Research, University of Bristol and the Wellcome Trust  
42 Institutional Strategic Support Fund.  
43  
44

## 45 **Ethics approval**

46 Ethics approval was granted from the Ethical Review Committee of the Faculty of Medicine, University  
47 of Peradeniya, Sri Lanka, on 14 June 2018.  
48

## 49 **Author contributions**

50 DWK, LS, JK, JLL and TR were responsible for study concept, design and funding acquisition. DWK and  
51 TR wrote the protocol. PB drafted the manuscript and coordinated manuscript preparation and  
52 revision. DWK, TR and PB were responsible for piloting the survey, and PB is responsible for supervising  
53 data collection. All authors provided critical evaluation and revision of the manuscript and have given  
54 final approval of the manuscript accepting responsibility for all aspects.  
55  
56  
57  
58  
59  
60

## References

1. WHO. Monitoring health for the SDGs: sustainable development goals. Geneva: WHO; 2017.
2. WHO. Preventing suicide - a global imperative. Geneva: WHO; 2014.
3. Knipe DW, Padmanathan P, Muthuwatta L, Metcalfe C, Gunnell D. Regional variation in suicide rates in Sri Lanka between 1955 and 2011: a spatial and temporal analysis. *BMC public health* 2017; **17**(1): 193.
4. Knipe DW, Gunnell D, Eddleston M. Preventing deaths from pesticide self-poisoning—learning from Sri Lanka's success. *The Lancet Global Health* 2017; **5**(7): e651-e2.
5. Gunnell D, Fernando R, Hewagama M, Priyangika W, Konradsen F, Eddleston M. The impact of pesticide regulations on suicide in Sri Lanka. *International journal of epidemiology* 2007; **36**(6): 1235-42.
6. Knipe DW, Metcalfe C, Fernando R, et al. Suicide in Sri Lanka 1975–2012: age, period and cohort analysis of police and hospital data. *BMC Public Health* 2014; **14**(1): 839.
7. Senarathna L, Jayamanna SF, Kelly PJ, Buckley NA, Dibley MJ, Dawson AH. Changing epidemiologic patterns of deliberate self poisoning in a rural district of Sri Lanka. *BMC Public Health* 2012; **12**(1): 593.
8. Enns MW, Cox BJ, Afifi TO, De Graaf R, Ten Have M, Sareen J. Childhood adversities and risk for suicidal ideation and attempts: a longitudinal population-based study. *Psychol Med* 2006; **36**(12): 1769-78.
9. Beutel ME, Tibubos AN, Klein EM, et al. Childhood adversities and distress—the role of resilience in a representative sample. *PLoS one* 2017; **12**(3): e0173826.
10. Gilbert R, Widom CS, Browne K, Fergusson D, Webb E, Janson S. Burden and consequences of child maltreatment in high-income countries. *The lancet* 2009; **373**(9657): 68-81.
11. Kessler RC, McLaughlin KA, Green JG, et al. Childhood adversities and adult psychopathology in the WHO World Mental Health Surveys. *Br J Psychiatry* 2010; **197**(5): 378-85.
12. Swannell S, Martin G, Page A, et al. Child maltreatment, subsequent non-suicidal self-injury and the mediating roles of dissociation, alexithymia and self-blame. *Child abuse & neglect* 2012; **36**(7-8): 572-84.
13. Hugo G, Ukwatta S. Sri Lankan female domestic workers overseas—The impact on their children. *Asian and Pacific Migration Journal* 2010; **19**(2): 237-63.
14. Gamburd MR. *The Kitchen Spoon's Handle: Transnationalism and Sri Lanka's Migrant Housemaids*. Ithaca: Cornell University Press; 2000.
15. Widiger T. *Suicide in Sri Lanka: The anthropology of an epidemic*. London: Routledge; 2015.
16. Department of Census and Statistics GoSL. *Census of population and housing*. Sri Lanka; 2012.
17. Pearson M, Metcalfe C, Jayamanne S, et al. Effectiveness of household lockable pesticide storage to reduce pesticide self-poisoning in rural Asia: a community-based, cluster-randomised controlled trial. *The Lancet* 2017; **390**(10105): 1863-72.
18. Rajapakse T, Griffiths KM, Christensen H. Characteristics of non-fatal self-poisoning in Sri Lanka: a systematic review. *BMC Public Health* 2013; **13**(1): 331.
19. Eddleston M, Gunnell D, Karunaratne A, De Silva D, Sheriff MR, Buckley NA. Epidemiology of intentional self-poisoning in rural Sri Lanka. *The British Journal of Psychiatry* 2005; **187**(6): 583-4.
20. Rannan-Eliya RP, Wijemanne N, Liyanage IK, et al. The quality of outpatient primary care in public and private sectors in Sri Lanka—how well do patient perceptions match reality and what are the implications? *Health policy and planning* 2014; **30**(suppl\_1): i59-i74.
21. Kessler RC, McLaughlin KA, Green JG, et al. Childhood adversities and adult psychopathology in the WHO World Mental Health Surveys. *The British Journal of Psychiatry* 2010; **197**(5): 378-85.
22. Enns MW, Cox BJ, Afifi TO, De Graaf R, Ten Have M, Sareen J. Childhood adversities and risk for suicidal ideation and attempts: a longitudinal population-based study. *Psychological medicine* 2006; **36**(12): 1769-78.

- 1  
2  
3 23. WHO. Adverse Childhood Experiences International Questionnaire. 2018.  
4 [http://www.who.int/violence\\_injury\\_prevention/violence/activities/adverse\\_childhood\\_experience](http://www.who.int/violence_injury_prevention/violence/activities/adverse_childhood_experience)  
5 [s/en/](http://www.who.int/violence_injury_prevention/violence/activities/adverse_childhood_experience).  
6  
7 24. Hanwella R, Ekanayake S, de Silva VA. The Validity and Reliability of the Sinhala Translation  
8 of the Patient Health Questionnaire (PHQ-9) and PHQ-2 Screener. *Depress Res Treat* 2014; **2014**:  
9 768978.  
10 25. IRD. National Mental Health Survey. 2015. <https://www.ird.lk/nmhs-study/>.  
11 26. Hanwella R, de Silva VA, Jayasekera NE. Alcohol use in a military population deployed in  
12 combat areas: a cross sectional study. *Subst Abuse Treat Prev Policy* 2012; **7**: 24.  
13 27. Sohal H, Eldridge S, Feder G. The sensitivity and specificity of four questions (HARK) to  
14 identify intimate partner violence: a diagnostic accuracy study in general practice. *BMC Fam Pract*  
15 2007; **8**: 49.  
16 28. AFSP. The Association of Social Capital and Self-Harm in Rural Sri Lanka. 2018.  
17 [https://afsp.org/our-work/research/research-grants/association-social-capital-self-harm-rural-sri-](https://afsp.org/our-work/research/research-grants/association-social-capital-self-harm-rural-sri-lanka/)  
18 [lanka/](https://afsp.org/our-work/research/research-grants/association-social-capital-self-harm-rural-sri-lanka/).  
19  
20 29. Kidger J, Heron J, Leon DA, Tilling K, Lewis G, Gunnell D. Self-reported school experience as a  
21 predictor of self-harm during adolescence: A prospective cohort study in the South West of England  
22 (ALSPAC). *Journal of affective disorders* 2015; **173**: 163-9.  
23 30. Appleton JJ, Christenson SL, Kim D, Reschly AL. Measuring cognitive and psychological  
24 engagement: Validation of the Student Engagement Instrument. *Journal of school psychology* 2006;  
25 **44**(5): 427-45.  
26 31. StataCorp. Stata Statistical Software: Release 15. College Station, TX: StataCorp LLC; 2017.  
27  
28  
29  
30  
31  
32  
33  
34  
35  
36  
37  
38  
39  
40  
41  
42  
43  
44  
45  
46  
47  
48  
49  
50  
51  
52  
53  
54  
55  
56  
57  
58  
59  
60

Figure 1 – Hypothesised conceptual model of self-harm

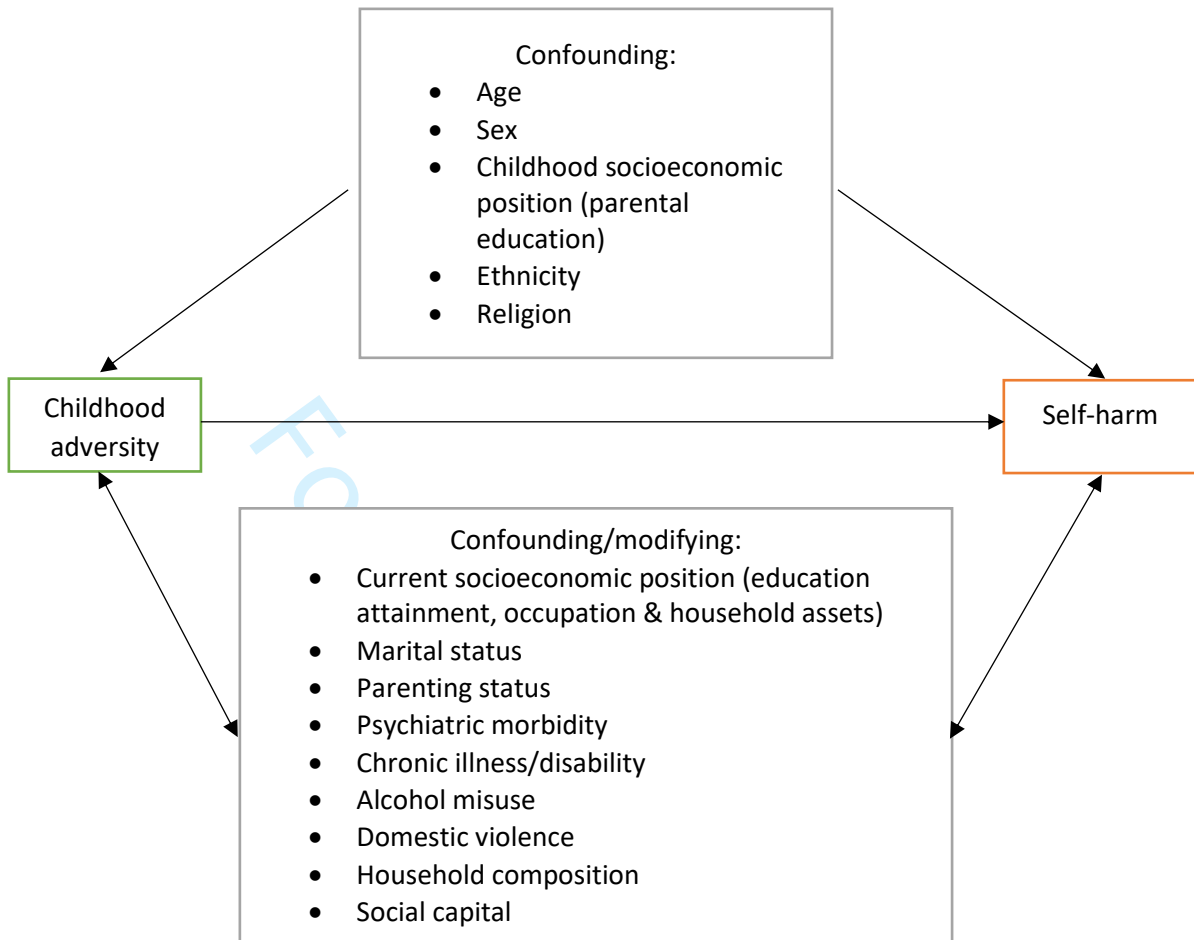

STROBE Statement—Checklist of items that should be included in reports of *case-control studies*

|                              | Item No | Recommendation                                                                                                                                                                                    | Page No |
|------------------------------|---------|---------------------------------------------------------------------------------------------------------------------------------------------------------------------------------------------------|---------|
| <b>Title and abstract</b>    | 1       | (a) Indicate the study's design with a commonly used term in the title or the abstract                                                                                                            | 1       |
|                              |         | (b) Provide in the abstract an informative and balanced summary of what was done and what was found                                                                                               | 2       |
| <b>Introduction</b>          |         |                                                                                                                                                                                                   |         |
| Background/rationale         | 2       | Explain the scientific background and rationale for the investigation being reported                                                                                                              | 3       |
| Objectives                   | 3       | State specific objectives, including any prespecified hypotheses                                                                                                                                  | 3       |
| <b>Methods</b>               |         |                                                                                                                                                                                                   |         |
| Study design                 | 4       | Present key elements of study design early in the paper                                                                                                                                           | 3       |
| Setting                      | 5       | Describe the setting, locations, and relevant dates, including periods of recruitment, exposure, follow-up, and data collection                                                                   | 3, 4    |
| Participants                 | 6       | (a) Give the eligibility criteria, and the sources and methods of case ascertainment and control selection. Give the rationale for the choice of cases and controls                               | 4       |
|                              |         | (b) For matched studies, give matching criteria and the number of controls per case                                                                                                               | 4       |
| Variables                    | 7       | Clearly define all outcomes, exposures, predictors, potential confounders, and effect modifiers. Give diagnostic criteria, if applicable                                                          | 4,5     |
| Data sources/<br>measurement | 8*      | For each variable of interest, give sources of data and details of methods of assessment (measurement). Describe comparability of assessment methods if there is more than one group              | 4,5     |
| Bias                         | 9       | Describe any efforts to address potential sources of bias                                                                                                                                         | 4       |
| Study size                   | 10      | Explain how the study size was arrived at                                                                                                                                                         | 4       |
| Quantitative variables       | 11      | Explain how quantitative variables were handled in the analyses. If applicable, describe which groupings were chosen and why                                                                      | 6       |
| Statistical methods          | 12      | (a) Describe all statistical methods, including those used to control for confounding                                                                                                             | 6       |
|                              |         | (b) Describe any methods used to examine subgroups and interactions                                                                                                                               | 6       |
|                              |         | (c) Explain how missing data were addressed                                                                                                                                                       | N/A     |
|                              |         | (d) If applicable, explain how matching of cases and controls was addressed                                                                                                                       | 6       |
|                              |         | (e) Describe any sensitivity analyses                                                                                                                                                             | 6       |
| <b>Results</b>               |         |                                                                                                                                                                                                   |         |
| Participants                 | 13*     | (a) Report numbers of individuals at each stage of study—eg numbers potentially eligible, examined for eligibility, confirmed eligible, included in the study, completing follow-up, and analysed | N/A     |
|                              |         | (b) Give reasons for non-participation at each stage                                                                                                                                              | N/A     |
|                              |         | (c) Consider use of a flow diagram                                                                                                                                                                | N/A     |
| Descriptive data             | 14*     | (a) Give characteristics of study participants (eg demographic, clinical, social) and information on exposures and potential confounders                                                          | N/A     |
|                              |         | (b) Indicate number of participants with missing data for each variable of interest                                                                                                               | N/A     |
| Outcome data                 | 15*     | Report numbers in each exposure category, or summary measures of exposure                                                                                                                         | N/A     |

|    |                          |    |                                                                                                                                                                                                              |
|----|--------------------------|----|--------------------------------------------------------------------------------------------------------------------------------------------------------------------------------------------------------------|
| 1  |                          |    |                                                                                                                                                                                                              |
| 2  |                          |    |                                                                                                                                                                                                              |
| 3  | Main results             | 16 | (a) Give unadjusted estimates and, if applicable, confounder-adjusted estimates and their precision (eg, 95% confidence interval). Make clear which confounders were adjusted for and why they were included |
| 4  |                          |    | N/A                                                                                                                                                                                                          |
| 5  |                          |    |                                                                                                                                                                                                              |
| 6  |                          |    |                                                                                                                                                                                                              |
| 7  |                          |    | (b) Report category boundaries when continuous variables were categorized                                                                                                                                    |
| 8  |                          |    | N/A                                                                                                                                                                                                          |
| 9  |                          |    | (c) If relevant, consider translating estimates of relative risk into absolute risk for a meaningful time period                                                                                             |
| 10 |                          |    | N/A                                                                                                                                                                                                          |
| 11 | Other analyses           | 17 | Report other analyses done—eg analyses of subgroups and interactions, and sensitivity analyses                                                                                                               |
| 12 |                          |    | N/A                                                                                                                                                                                                          |
| 13 |                          |    |                                                                                                                                                                                                              |
| 14 |                          |    |                                                                                                                                                                                                              |
| 15 | <b>Discussion</b>        |    |                                                                                                                                                                                                              |
| 16 | Key results              | 18 | Summarise key results with reference to study objectives                                                                                                                                                     |
| 17 |                          |    | N/A                                                                                                                                                                                                          |
| 18 | Limitations              | 19 | Discuss limitations of the study, taking into account sources of potential bias or imprecision. Discuss both direction and magnitude of any potential bias                                                   |
| 19 |                          |    | N/A                                                                                                                                                                                                          |
| 20 | Interpretation           | 20 | Give a cautious overall interpretation of results considering objectives, limitations, multiplicity of analyses, results from similar studies, and other relevant evidence                                   |
| 21 |                          |    | N/A                                                                                                                                                                                                          |
| 22 | Generalisability         | 21 | Discuss the generalisability (external validity) of the study results                                                                                                                                        |
| 23 |                          |    | N/A                                                                                                                                                                                                          |
| 24 | <b>Other information</b> |    |                                                                                                                                                                                                              |
| 25 | Funding                  | 22 | Give the source of funding and the role of the funders for the present study and, if applicable, for the original study on which the present article is based                                                |
| 26 |                          |    | 7                                                                                                                                                                                                            |
| 27 |                          |    |                                                                                                                                                                                                              |
| 28 |                          |    |                                                                                                                                                                                                              |

\*Give information separately for cases and controls.

**Note:** An Explanation and Elaboration article discusses each checklist item and gives methodological background and published examples of transparent reporting. The STROBE checklist is best used in conjunction with this article (freely available on the Web sites of PLoS Medicine at <http://www.plosmedicine.org/>, Annals of Internal Medicine at <http://www.annals.org/>, and Epidemiology at <http://www.epidem.com/>). Information on the STROBE Initiative is available at <http://www.strobe-statement.org>.

# BMJ Open

## Childhood adversity and deliberate self-poisoning in Sri Lanka: a protocol for a hospital-based case-control study

|                                 |                                                                                                                                                                                                                                                                                                                                                                                                           |
|---------------------------------|-----------------------------------------------------------------------------------------------------------------------------------------------------------------------------------------------------------------------------------------------------------------------------------------------------------------------------------------------------------------------------------------------------------|
| Journal:                        | <i>BMJ Open</i>                                                                                                                                                                                                                                                                                                                                                                                           |
| Manuscript ID                   | bmjopen-2018-027766.R1                                                                                                                                                                                                                                                                                                                                                                                    |
| Article Type:                   | Protocol                                                                                                                                                                                                                                                                                                                                                                                                  |
| Date Submitted by the Author:   | 19-Apr-2019                                                                                                                                                                                                                                                                                                                                                                                               |
| Complete List of Authors:       | Knipe, Duleeka; University of Bristol, School of Social and Community Medicine<br>Bandara, Piamee; Western Sydney University, Translational Health Research Institute,<br>Senarathna, Lalith; Rajarata University of Sri Lanka, Department of Health Promotion<br>Kidger, Judi; Univ Bristol,<br>López-López, José; Univ of Bristol,<br>Rajapakse, Thilini; University of Peradeniya, Faculty of Medicine |
| <b>Primary Subject Heading</b>: | Mental health                                                                                                                                                                                                                                                                                                                                                                                             |
| Secondary Subject Heading:      | Epidemiology, Global health, Mental health                                                                                                                                                                                                                                                                                                                                                                |
| Keywords:                       | Suicide & self-harm < PSYCHIATRY, childhood adversity, domestic violence, low and middle income countries                                                                                                                                                                                                                                                                                                 |
|                                 |                                                                                                                                                                                                                                                                                                                                                                                                           |

SCHOLARONE™  
Manuscripts

1  
2  
3 **Childhood adversity and deliberate self-poisoning in Sri Lanka: a protocol for a hospital-based case-**  
4 **control study**  
5

6 Duleeka Knipe<sup>1,2</sup>, Piamee Bandara<sup>2,3</sup>, Lalith Senarathna<sup>2,4</sup>, Judi Kidger<sup>1</sup>, José A López-López<sup>1</sup>, Thilini  
7 Rajapakse<sup>5</sup>  
8

9 **Affiliations**

10 1. Population Health Sciences, Bristol Medical School, University of Bristol, Canynge Hall, 39 Whatley  
11 Road, Bristol BS8 2PS, UK

12 2. South Asian Clinical Toxicology Research Collaboration (SACTRC), Faculty of Medicine, University of  
13 Peradeniya, Peradeniya, Sri Lanka

14 3. Translational Health Research Institute, Western Sydney University, Sydney, Australia

15 4. Department of Health Promotion, Faculty of Applied Sciences, Rajarata University, Anuradhapura,  
16 Sri Lanka

17 5. Department of Psychiatry, Faculty of Medicine, University of Peradeniya, Peradeniya, Sri Lanka  
18

19 **Word count**

20 Manuscript = 3709  
21

22 **Corresponding author address:**

23 Duleeka Knipe

24 Population Health Sciences

25 Canynge Hall 2.12

26 Whatley Road

27 Bristol

28 BS8 2PS, UK

29 Tel. +44117 3314574

30 E [Dee.Knipe@bristol.ac.uk](mailto:Dee.Knipe@bristol.ac.uk)  
31  
32  
33  
34  
35  
36  
37  
38  
39  
40  
41  
42  
43  
44  
45  
46  
47  
48  
49  
50  
51  
52  
53  
54  
55  
56  
57  
58  
59  
60



## ABSTRACT

### Introduction:

Childhood adversity (CA) has been suggested as a key risk factor for suicidal behaviour, but evidence from low and middle-income countries (LMIC) is lacking. In Sri Lanka, CA, in the form of child maltreatment or as a consequence of maternal separation, has been highlighted in primarily qualitative or case-series work as a potentially important determinant of suicidal behaviour. To date, there have been no quantitative studies to investigate CA as a key exposure associated with suicidal behaviour in Sri Lanka. The aim of the research is to understand the association between CA and suicidal behaviour in Sri Lanka and to identify potentially modifiable factors to reduce any observed increased risk of suicidal behaviour associated with CA.

### Methods and analysis:

This is a hospital-based case-control study. Cases (n=200) will be drawn from individuals admitted to the medical toxicology ward of the Teaching Hospital Peradeniya (THP), Sri Lanka for medical management of intentional self-poisoning. Sex and age frequency matched controls (n=200) will be recruited from either patients or accompanying visitors presenting at the outpatient department and clinic of the same hospital for conditions unrelated to the outcome of interest. Conditional logistic regression will be used to investigate the association between CA and deliberate self-poisoning and whether the association is altered by other key factors including socio-economic status, psychiatric morbidity, current experiences of domestic violence and social support.

### Ethics and dissemination:

Ethics approval has been obtained from the Ethical Review Committee of the Faculty of Medicine, University of Peradeniya, Sri Lanka. Researchers have been trained in administering the questionnaire and a participant safety and distress protocol has been designed to guide researchers in ensuring participant safety and how to deal with a distressed participant. Results will be disseminated in local policy fora and peer-reviewed articles, local media, and national and international conferences.

## ARTICLE SUMMARY

### Strengths and limitations of this study

- This is the first quantitative study to determine the association of childhood adversity and deliberate self-harm in Sri Lanka.
- This study will help identify potentially modifiable risk factors to inform the design of interventions and policies to reduce suicidal behaviour in the Sri Lankan context.
- Internationally validated instruments for the assessment of childhood adversity, depression, alcohol use and domestic violence and pretested forms for the assessment of other variables of interest are used.
- Hospital control outpatients may have a different exposure distribution compared to the base-population – for example they may have higher rates of mood disorders and suicidal ideation, introducing the potential for selection bias.
- The reported rate of abuse (childhood and current) may be underestimated due to cultural stigma and recall issues.

## INTRODUCTION

Suicide is a significant cause of mortality resulting in approximately 800,000 deaths per year globally, 39% of which occur in the WHO region of South-East Asia.<sup>1</sup> WHO estimates suggest that cases of non-fatal self-harm occur at least 20 times more frequently than the number of suicides.<sup>2</sup> In the last few decades, Sri Lanka, a middle-income country in South Asia, has experienced significant variations in its suicide rate, reaching its peak in 1995 of 47.0 per 100,000.<sup>3 4</sup> In response to the magnitude of this public health issue, a Presidential Task Force on Suicide Prevention was established in 1997, whose actions included decriminalising suicidal acts and restricting the availability of pesticides, the most common means of suicide in Sri Lanka.<sup>5</sup> Although reported rates of suicide have declined over the past two decades, studies of trends in intentional self-harm suggest that incidence of non-fatal intentional self-harm is increasing, especially among young people.<sup>6 7</sup> A better understanding of the risk factors for suicide and self-harm in these settings is essential for developing informed suicide prevention policies.

Childhood adversity (CA) has been suggested as a key risk factor for suicidal behaviour<sup>8</sup>, but evidence from low and middle-income countries (LMIC) is lacking. Adverse childhood experiences may comprise acts of physical, sexual, emotional abuse as well as emotional and physical neglect and witnessing domestic violence.<sup>9 10</sup> It has been estimated that 30% of the risk of mental disorders in LMICs is attributable to CA,<sup>11</sup> and evidence from high income countries (HIC) reports that CA is a significant risk factor for suicidal behaviour.<sup>8 12</sup> However, the challenges faced in LMICs are likely to be different, as parental mortality is much higher and the rise in temporary labour migration has resulted in millions of children growing up with one or both parents absent, disrupting parental ties and family structures.<sup>13</sup> In Sri Lanka, CA, in the form of child maltreatment (e.g. domestic violence), or as a consequence of maternal separation, has been highlighted in primarily qualitative or case-series work as a significant contributor for suicidal behaviour.<sup>14 15</sup> To date, there have been no quantitative studies to investigate CA as a key exposure associated with suicidal behaviour in Sri Lanka, nor how CA might be associated with suicidal behaviour in the presence of other established socio-demographic and psychiatric risk factors. Current epidemiological evidence is lacking and is urgently needed as Sri Lanka formulates its suicide prevention activities.

The aim of this research is to investigate the association between CA and suicidal behaviour in Sri Lanka, and to identify potentially modifiable factors to reduce any increased risk of suicidal behaviour associated with CA (see Figure 1 – Hypothesised conceptual model of self-harm). The results from this study will help inform the design of appropriate interventions to reduce the number of preventable suicide deaths in this country and thereby also reduce the number of individuals bereaved by suicide.

## METHODS AND ANALYSIS

### Study setting

The study will be carried out in the Teaching Hospital Peradeniya (THP), located in the Kandy District, Central Province of Sri Lanka. Kandy District has a total population of 1,375,382 and is 115 km east from Colombo, the capital of Sri Lanka.<sup>16</sup> The THP is a tertiary referral hospital with a catchment area that includes the North Central, North Western and Sabaragamuwa Provinces.

### Patient and Public Involvement

Priority of the research question, choice of outcome measures and questionnaire design were informed by discussions with community members. At the end of a previous study exploring the association between socioeconomic position and suicidal behaviour in Sri Lanka,<sup>17</sup> ten community workshops were conducted in a rural area with a high risk of suicide. The workshops were conducted with community members aged 18 years and over, representing both sexes. A wide range of

1  
2  
3 stakeholders were engaged including: teachers, social workers, Grama Niladhari (village officers),  
4 community leaders/members, national government officials (Ministry of Health, Education, Social and  
5 Welfare), non-governmental agencies, researchers and charities.<sup>18</sup> During the workshops community  
6 members engaged in discussions on the possible pathways to suicidal behaviour. In all ten workshops,  
7 child abuse, maltreatment and neglect were highlighted as important risk factors on the causal  
8 pathway and in the intergenerational cycle of poverty and heightened suicide risk. These discussions  
9 informed the design of the questionnaire and planned analysis in terms of factors considered as  
10 exposures and confounders. The questionnaire used in this study was also piloted with patients in the  
11 toxicology unit and outpatient department of the THP and revised as a result.  
12  
13

### 14 **Study design**

15 An individually matched hospital-based case-control design will be used in this study. Cases will be  
16 drawn from individuals admitted to the medical toxicology ward (ward 17) of the THP (Sri Lanka) for  
17 medical management of deliberate self-poisoning. All persons presenting to the THP due to poisoning  
18 (accidental or deliberate) for emergency care are admitted to the toxicology unit (ward 17) for  
19 observation and treatment as needed. This case definition excludes self-harm due to other methods,  
20 for example cutting; however self-poisoning represents the most common method of self-harm cases  
21 presenting to hospital in Sri Lanka.<sup>19-21</sup>  
22  
23

24 Sex and age frequency matched controls will be drawn from patients and accompanying visitors  
25 presenting to the outpatient department of the THP. Outpatients typically present with conditions  
26 such as cough, chest infection, hypertension, pregnancy and diabetes related complications,  
27 conditions unrelated to the outcome of interest for this study.<sup>22</sup> Visitors and patients attending the  
28 nearby outpatient clinic for specialist care treatment and management will also be recruited.  
29  
30

### 31 **Inclusion and exclusion criteria**

32 All patients aged 18 years and over, admitted to the study site (ward 17, THP) during the 6-month  
33 study period, for medical management of deliberate self-poisoning, will be considered for inclusion in  
34 the study as a case. Patients and visitors attending the outpatient department and specialist clinics of  
35 the THP will be considered for recruitment as controls. All participants will be provided with the  
36 participant information sheet and will sign a consent form prior to being enrolled into the study.  
37  
38

39 Patients who are physically unable or too unwell to participate in the study interview prior to discharge  
40 from hospital, and those already diagnosed with an intellectual disability or dementia, will be excluded  
41 from the study. Those admitted for management of accidental poisoning will not be recruited.  
42 Accidental poisoning will be initially ascertained from the patient admission record and verbally  
43 reconfirmed by the patient through self-report.  
44  
45

46 As the focus of this study is on current suicidal behaviour, controls with a previous self-harm episode  
47 will not be excluded from the study but this information will be recorded. For every control with a  
48 previous self-harm episode, another control matched by sex and age with no previous self-harm will  
49 be recruited; and cases with a previous history of self-harm can be excluded in sensitivity analyses.  
50  
51

### 52 **Sample size**

53 The estimated monthly case admission for intentional self-poisoning within ward 17 is approximately  
54 100 cases per month. With the aim of collecting 50% of cases per month, we plan to recruit 200 cases  
55 in total and 200 age and sex frequency matched controls over a 6-month time period. Assuming 20%  
56 of controls report a history of CA (odd=0.25), a 2-fold difference in risk will be detectable with 86%  
57 power ( $\alpha = 0.05$ ).<sup>11 23</sup>  
58  
59

### 60 **DATA COLLECTION**

1  
2  
3 The study is expected to recruit participants over a 6-month period, from 18 July 2018 to 10 January  
4 2019. Interviews will be conducted by trained data collectors in the participant's preferred language  
5 (Sinhala, Tamil or English). Interviewers are not blinded to the case or control status of the participant  
6 and the same interviewers who recruit cases will also recruit controls. In order to minimise interviewer  
7 bias the interviewers will be given a standard script which they are requested to follow regardless of  
8 case status. The supervisor (PB) will regularly shadow interviewers to ensure that the interviewers  
9 adhered to the script.  
10

11  
12 Given the nature of the physical layout of the ward and outpatient department, and the sensitivity of  
13 the questions, interviews will only be conducted with the participant if they are able to accompany  
14 the data collector to a designated confidential space nearby, for interview. This ensures that the  
15 interview can be conducted in private and in the absence of accompanying friends or family members.  
16 Interviews will be conducted during non-visiting hours for patients in ward 17 to ensure responses will  
17 not be influenced by another person and for patient safety.  
18

## 19 20 **Questionnaires**

### 21 **Main exposure**

22 The main exposure of interest in this study is childhood adversity. Childhood adversity data will be  
23 collected using the WHO Adverse Childhood Experiences International Questionnaire, a culturally  
24 adapted screening tool for childhood adversity.<sup>24</sup> The questionnaire is designed for administration to  
25 people over the age of 18. Questions cover family dysfunction; physical, sexual and emotional abuse  
26 and neglect by parents or caregivers; peer violence; witnessing community violence, and exposure to  
27 collective violence. The English questionnaire has been translated, back-translated and previously  
28 piloted into the two local languages.  
29

30  
31 In addition to the questions included in the WHO questionnaire, participants will be asked pretested  
32 questions about their experiences of parental (mother/father) absence due to temporary foreign  
33 migration during the first 18 years of life.  
34

### 35 **Confounders and other study factors**

36 Demographic data will be collected using a pretested questionnaire. Data on age, sex, ethnicity,  
37 religion, marital status, residential area, household composition, parenting status (i.e. presence and  
38 number of children and age of youngest child) will be collected. Employment status will also be  
39 ascertained, and a description of participant occupation will be defined based on the following  
40 categories, 'elementary occupation', 'armed forces', 'craft or related trades worker', 'skilled  
41 agricultural worker', 'service worker', 'technician', 'small business holder', 'big business holder',  
42 'professional', 'manager/legislator/administration'.  
43

44  
45 For socioeconomic position, data will be collected on individual educational attainment, parental  
46 education and motorised vehicle ownership (a proxy measure of household socioeconomic position).  
47 For individual and parental educational attainment, participants will be asked to select the highest  
48 completed level of education from the following categories, 'no schooling', 'completed between  
49 grades 1-5', 'completed between grades 6-10', 'passed ordinary level', 'passed advanced level',  
50 'completed university/postgraduate qualifications'. For motorised vehicle ownership, participants will  
51 be asked if they own a motorbike, three-wheeler vehicle, car/van, tractor, and/or a bus.  
52

53  
54 Information on the type of poison ingested for the current self-harm episode will be collected based  
55 on the following categories: 'medicinal overdose', 'pesticide ingestion', 'plant poison', 'petroleum-  
56 based products', 'rat poison', 'other household chemical', or 'other'. Where possible, participants will  
57 be asked to specify the name of the poison ingested.  
58  
59  
60

1  
2  
3 Data on past self-harm behaviour will be collected via self-report. Participants will be asked if they  
4 have ever previously self-harmed. This will be recorded regardless of whether or not the episode  
5 resulted in hospital presentation. Participants will also be asked if they know of a close friend or family  
6 member who has self-harmed or died by suicide during the past year. Past psychiatric morbidity (i.e.  
7 diagnosed with a mental disorder) and whether or not the participant experiences existing  
8 comorbidities, such as chronic illness and physical disabilities, will also be collected.  
9

10  
11 Data on current psychiatric morbidity will also be collected. Participants will be asked to complete the  
12 9-item Patient Health Questionnaire (PHQ-9). The PHQ-9 is a brief, one-page self-administered  
13 questionnaire, that is internationally validated for assessing the severity of depression. The PHQ-9 has  
14 been translated and validated for use in the Sinhala-speaking Sri Lankan population.<sup>25</sup> The translated  
15 questionnaire has previously been used in the National Mental Health Survey of Sri Lanka for both  
16 Sinhala and Tamil populations.<sup>26</sup>  
17

18  
19 Information on alcohol use disorders will be collected, based on the Alcohol Use Disorders  
20 Identification Test (AUDIT), which has been developed by the WHO and also been validated for the  
21 local population,<sup>27</sup> and has been previously used in Sri Lanka. The AUDIT comprises questions related  
22 to the frequency and quantity of alcohol consumption and the effect of alcohol consumption on  
23 behaviour. Suicidal intention and lethality of the attempt will not be assessed due to constraints on  
24 the length of the questionnaire.  
25

26 Participants will also be asked if they have learned about sexual and reproductive health rights through  
27 school and if the information delivered was useful. In addition, data on current exposure to domestic  
28 violence will be collected using a translated, back-translated and piloted version of the 4-question  
29 HARK questionnaire.<sup>28</sup> The four short questions aim to capture different components of domestic  
30 violence, relating to emotional abuse, psychological abuse, sexual, and physical violence.  
31

32 Finally, participants will also be asked questions relating to their social capital, including their  
33 emotional support networks and sense of belonging. The questions used in this survey are questions  
34 that have been used as part of a large social capital community survey in the North Central Province  
35 of Sri Lanka.<sup>29</sup> Questions are designed to capture whether participants are currently emotionally  
36 supported at the household and community levels and if they feel a sense of belonging. Information  
37 will also be collected on past social capital based on a sense of belonging at school, and interaction  
38 with peers and teachers.<sup>30 31</sup>  
39

#### 40 41 **Analysis plan** 42

43  
44 To ensure that questionnaires are as complete as possible, the supervisor (PB) will review data  
45 missingness on a regular basis to ensure that data collectors are not consistently missing information.  
46 Once the data collection has been finalised, the level of missingness will be assessed. It is anticipated  
47 that any missingness will not be missing at random (a requirement for imputation) and therefore  
48 missing data will not be imputed in the main analyses. Instead, it is anticipated that our main analyses  
49 will be based on complete cases only, excluding case-control pairs that contain missing data. A full  
50 case analysis (regardless of missing) will be conducted to explore whether excluding case-control pairs  
51 with missing data might have introduced bias in the results.  
52

53  
54 Conditional logistic regression techniques will be used to examine the association between CA and  
55 deliberate self-poisoning (outcome). In the primary analysis, CA will be quantified using the total score  
56 of the WHO Adverse Childhood Experiences International Questionnaire, and unadjusted associations  
57 with the outcome will be presented. Additionally, separate analyses will be conducted using questions  
58 about parental absence (a proxy for CA) and including both the WHO questionnaire and the questions  
59  
60



1  
2  
3 about parental absence as separate covariates in the model to explore the partial association of each  
4 with the outcome.  
5

6  
7 The study will investigate the potential confounding effects of parental education, ethnicity and  
8 religion in a series of models. Potential confounders will be specified as covariates in models with  
9 measures of CA and parental absence as the main exposures of interest, following investigation of  
10 univariate associations between each potential confounder and self-harm. Additional key factors, such  
11 as current socio-economic status, marital and parental status, psychiatric morbidity, current  
12 experiences of domestic violence and social support, will also be incorporated to investigate potential  
13 effect measure changes. The statistical software Stata version 15<sup>32</sup> will be used for data analysis.  
14

## 15 **ETHICS**

16  
17 Each participant will be given a verbal explanation of the study with a written information sheet (in  
18 their native language) and they will be given time to read it. Permission to recruit will be sought via  
19 written informed consent. Participants will be informed during their consent process that the  
20 interview is voluntary and that they have the right to withdraw at any time during or after the  
21 interview. Participants will also be informed about the purpose of the study, the members of the  
22 research team, the reason they have been chosen for the study, consequences of participation  
23 (potential benefits and disadvantages), confidentiality, potential outcomes of the research, and  
24 contact details of the Principal Investigator for further information. If the researcher suspects that the  
25 participant does not have the cognitive functioning to give informed consent, the individual will not  
26 be recruited for the study.  
27  
28  
29

30 The study includes questions related to self-harm, CA and current domestic violence which may result  
31 in participant distress. A participant safety and distress protocol has been designed to guide  
32 researchers in ensuring participant safety and how to deal with a distressed participant. With regards  
33 to risk of self-harm, the protocol advises that if the participant reports experiencing suicidal thoughts  
34 daily during the preceding two weeks, they will be referred to the Psychiatry Clinic, THP held every  
35 Thursday for further management and follow up. Where project staff have reason to believe that the  
36 participant is at an immediate risk to themselves or others, the psychiatric on-call doctor will be  
37 notified. Participants are informed that they are eligible to withdraw from the study at any point, and  
38 that this will have no adverse effect on their medical or psychiatric management or follow up. All  
39 interviews will be conducted in a manner that ensures that the participants' usual medical treatment  
40 or care does not get delayed or adversely impacted due to study participation.  
41  
42  
43

44 If during the completion of this questionnaire the participant discloses a child safeguarding issue (i.e.  
45 current sexual abuse of a child, under the age of 18), project staff will notify the principal investigator  
46 (DWK) and the local principal investigator (TR) will inform the National Child Protection Authority  
47 (NCPA), as appropriate. Participants will be informed during the consent process that such disclosures  
48 will result in notification. The circumstances under which confidentiality would be broken will be  
49 explained to the participant during the informed consent process.  
50  
51

52 Participants will be asked questions about domestic abuse, and if these questions are asked in the  
53 presence of the perpetrator of that abuse or other family members this may have adverse outcomes  
54 for the participant. In recognition of this risk, the interview will only be conducted in private during  
55 non-visiting hours and in a private location in the hospital. If current domestic abuse is disclosed, the  
56 participant will be offered information about help available locally and if appropriate, the patient will  
57 also be offered a referral to the psychiatry clinic.  
58  
59  
60

## DISSEMINATION

Findings from this research will be published academically in peer-reviewed articles and will also be given publicity in the local media. Findings may also be disseminated at national and international conferences, health symposia and local policy fora, for example, local government and non-government agencies. Any participant who is interested can also receive a copy of the report of the research and the outcomes from the investigators.

## Acknowledgements

The authors would like to thank the senior academics who have acted as advisors for the study: Professor David Gunnell; Professor Gene Feder; Professor Chris Metcalfe (University of Bristol), Professor Michael Eddleston, (University of Edinburgh), and Professor Flemming Konradsen (University of Copenhagen). The authors also thank the community members who informed the direction of the research and study design. The authors thank Professor Andrew Page (Western Sydney University), for his valuable feedback on the manuscript and staff at SACTRC, in particular, Indunil Abeyratne and Chamil Kumara for their support in setting up the study. In addition, the authors would like to acknowledge the significant contribution of the data collection team Kasuni Silva, Tharuka Silva, Sandareka Samarakoon and Azra Aroos, and the staff on ward 17 and OPD of the Teaching Hospital Peradeniya for accommodating this research.

## Competing interests

None declared.

## Funding statement

This work is supported by UK Medical Research Council (grant number MC\_PC\_MR/R019622/1), and the Elizabeth Blackwell Institute for Health Research, University of Bristol and the Wellcome Trust Institutional Strategic Support Fund.

## Ethics approval

Ethics approval was granted from the Ethical Review Committee of the Faculty of Medicine, University of Peradeniya, Sri Lanka, on 14 June 2018.

## Author contributions

DWK, LS, JK, JLL and TR were responsible for study concept, design and funding acquisition. DWK and TR wrote the protocol. PB drafted the manuscript and coordinated manuscript preparation and revision. DWK, TR and PB were responsible for piloting the survey, and PB is responsible for supervising data collection. All authors provided critical evaluation and revision of the manuscript and have given final approval of the manuscript accepting responsibility for all aspects.

## Figure 1 – Hypothesised conceptual model of self-harm

## Licence statement

I, the Submitting Author has the right to grant and does grant on behalf of all authors of the Work (as defined in the below author licence), an exclusive licence and/or a non-exclusive licence for contributions from authors who are: i) UK Crown employees; ii) where BMJ has agreed a CC-BY licence shall apply, and/or iii) in accordance with the terms applicable for US Federal Government officers or employees acting as part of their official duties; on a worldwide, perpetual, irrevocable, royalty-free basis to BMJ Publishing Group Ltd ("BMJ") its licensees and where the relevant Journal is co-owned by BMJ to the co-owners of the Journal, to publish the Work in BMJ Open and any other BMJ products and to exploit all rights, as set out in our [licence](#).

1  
2  
3  
4 The Submitting Author accepts and understands that any supply made under these terms is made by  
5 BMJ to the Submitting Author unless you are acting as an employee on behalf of your employer or a  
6 postgraduate student of an affiliated institution which is paying any applicable article publishing  
7 charge ("APC") for Open Access articles. Where the Submitting Author wishes to make the Work  
8 available on an Open Access basis (and intends to pay the relevant APC), the terms of reuse of such  
9 Open Access shall be governed by a Creative Commons licence – details of these licences and  
10 which [Creative Commons](#) licence will apply to this Work are set out in our licence referred to above.  
11  
12

### 13 References

- 16 1. WHO. Monitoring health for the SDGs: sustainable development goals. Geneva: WHO 2017.
- 17 2. WHO. Preventing suicide - a global imperative. Geneva: WHO 2014.
- 18 3. Knipe DW, Padmanathan P, Muthuwatta L, et al. Regional variation in suicide rates in Sri Lanka  
19 between 1955 and 2011: a spatial and temporal analysis. *BMC public health* 2017;17(1):193.
- 20 4. Knipe DW, Gunnell D, Eddleston M. Preventing deaths from pesticide self-poisoning—learning  
21 from Sri Lanka's success. *The Lancet Global Health* 2017;5(7):e651-e52.
- 22 5. Gunnell D, Fernando R, Hewagama M, et al. The impact of pesticide regulations on suicide in Sri  
23 Lanka. *International journal of epidemiology* 2007;36(6):1235-42.
- 24 6. Knipe DW, Metcalfe C, Fernando R, et al. Suicide in Sri Lanka 1975–2012: age, period and cohort  
25 analysis of police and hospital data. *BMC Public Health* 2014;14(1):839.
- 26 7. Senarathna L, Jayamanne SF, Kelly PJ, et al. Changing epidemiologic patterns of deliberate self  
27 poisoning in a rural district of Sri Lanka. *BMC Public Health* 2012;12(1):593.
- 28 8. Enns MW, Cox BJ, Afifi TO, et al. Childhood adversities and risk for suicidal ideation and attempts:  
29 a longitudinal population-based study. *Psychol Med* 2006;36(12):1769-78. doi:  
30 10.1017/S0033291706008646 [published Online First: 2006/09/27]
- 31 9. Beutel ME, Tibubos AN, Klein EM, et al. Childhood adversities and distress—the role of resilience in  
32 a representative sample. *PLoS one* 2017;12(3):e0173826.
- 33 10. Gilbert R, Widom CS, Browne K, et al. Burden and consequences of child maltreatment in high-  
34 income countries. *The lancet* 2009;373(9657):68-81.
- 35 11. Kessler RC, McLaughlin KA, Green JG, et al. Childhood adversities and adult psychopathology in  
36 the WHO World Mental Health Surveys. *The British Journal of Psychiatry* 2010;197(5):378-  
37 85.
- 38 12. Swannell S, Martin G, Page A, et al. Child maltreatment, subsequent non-suicidal self-injury and  
39 the mediating roles of dissociation, alexithymia and self-blame. *Child abuse & neglect*  
40 2012;36(7-8):572-84.
- 41 13. Hugo G, Ukwatta S. Sri Lankan female domestic workers overseas—The impact on their children.  
42 *Asian and Pacific Migration Journal* 2010;19(2):237-63.
- 43 14. Gamburd MR. The Kitchen Spoon's Handle: Transnationalism and Sri Lanka's Migrant  
44 Housemaids. Ithaca: Cornell University Press 2000.
- 45 15. Widger T. Suicide in Sri Lanka: The anthropology of an epidemic. London: Routledge 2015.
- 46 16. Department of Census and Statistics GoSL. Census of population and housing. Sri Lanka 2012.
- 47 17. Knipe D, Gunnell D, Pieris R, et al. Is socioeconomic position associated with risk of attempted  
48 suicide in rural Sri Lanka? A cross-sectional study of 165 000 individuals. *BMJ open*  
49 2017;7(3):e014006.
- 50 18. Knipe DW, Metcalfe C, Lambert H, et al. Preventing suicide in Sri Lanka: Supporting vulnerable  
51 populations *Policy Bristol* 2017;Policy Report 20
- 52 19. Pearson M, Metcalfe C, Jayamanne S, et al. Effectiveness of household lockable pesticide storage  
53 to reduce pesticide self-poisoning in rural Asia: a community-based, cluster-randomised  
54 controlled trial. *The Lancet* 2017;390(10105):1863-72.  
55  
56  
57  
58  
59  
60



- 1
  - 2
  - 3
  - 4
  - 5
  - 6
  - 7
  - 8
  - 9
  - 10
  - 11
  - 12
  - 13
  - 14
  - 15
  - 16
  - 17
  - 18
  - 19
  - 20
  - 21
  - 22
  - 23
  - 24
  - 25
  - 26
  - 27
  - 28
  - 29
  - 30
  - 31
  - 32
  - 33
  - 34
  - 35
  - 36
  - 37
  - 38
  - 39
  - 40
  - 41
  - 42
  - 43
  - 44
  - 45
  - 46
  - 47
  - 48
  - 49
  - 50
  - 51
  - 52
  - 53
  - 54
  - 55
  - 56
  - 57
  - 58
  - 59
  - 60
20. Rajapakse T, Griffiths KM, Christensen H. Characteristics of non-fatal self-poisoning in Sri Lanka: a systematic review. *BMC Public Health* 2013;13(1):331.
21. Eddleston M, Gunnell D, Karunaratne A, et al. Epidemiology of intentional self-poisoning in rural Sri Lanka. *The British Journal of Psychiatry* 2005;187(6):583-84.
22. Rannan-Eliya RP, Wijemanne N, Liyanage IK, et al. The quality of outpatient primary care in public and private sectors in Sri Lanka—how well do patient perceptions match reality and what are the implications? *Health policy and planning* 2014;30(suppl\_1):i59-i74.
23. Enns MW, Cox BJ, Afifi TO, et al. Childhood adversities and risk for suicidal ideation and attempts: a longitudinal population-based study. *Psychological medicine* 2006;36(12):1769-78.
24. WHO. Adverse Childhood Experiences International Questionnaire Geneva: WHO; 2018 [Available from: [http://www.who.int/violence\\_injury\\_prevention/violence/activities/adverse\\_childhood\\_experiences/en/](http://www.who.int/violence_injury_prevention/violence/activities/adverse_childhood_experiences/en/)].
25. Hanwella R, Ekanayake S, de Silva VA. The Validity and Reliability of the Sinhala Translation of the Patient Health Questionnaire (PHQ-9) and PHQ-2 Screener. *Depress Res Treat* 2014;2014:768978. doi: 10.1155/2014/768978 [published Online First: 2014/05/06]
26. IRD. National Mental Health Survey: Institute for Research and Development; 2015 [Available from: <https://www.ird.lk/nmhs-study/>].
27. Hanwella R, de Silva VA, Jayasekera NE. Alcohol use in a military population deployed in combat areas: a cross sectional study. *Subst Abuse Treat Prev Policy* 2012;7:24. doi: 10.1186/1747-597X-7-24 [published Online First: 2012/06/15]
28. Sohal H, Eldridge S, Feder G. The sensitivity and specificity of four questions (HARK) to identify intimate partner violence: a diagnostic accuracy study in general practice. *BMC Fam Pract* 2007;8:49. doi: 10.1186/1471-2296-8-49 [published Online First: 2007/08/31]
29. AFSP. The Association of Social Capital and Self-Harm in Rural Sri Lanka: American Foundation for Suicide Prevention; 2018 [Available from: <https://afsp.org/our-work/research/research-grants/association-social-capital-self-harm-rural-sri-lanka/>].
30. Kidger J, Heron J, Leon DA, et al. Self-reported school experience as a predictor of self-harm during adolescence: A prospective cohort study in the South West of England (ALSPAC). *Journal of affective disorders* 2015;173:163-69.
31. Appleton JJ, Christenson SL, Kim D, et al. Measuring cognitive and psychological engagement: Validation of the Student Engagement Instrument. *Journal of school psychology* 2006;44(5):427-45.
32. StataCorp. Stata Statistical Software: Release 15. College Station, TX: StataCorp LLC 2017.

Figure 1 – Hypothesised conceptual model of self-harm

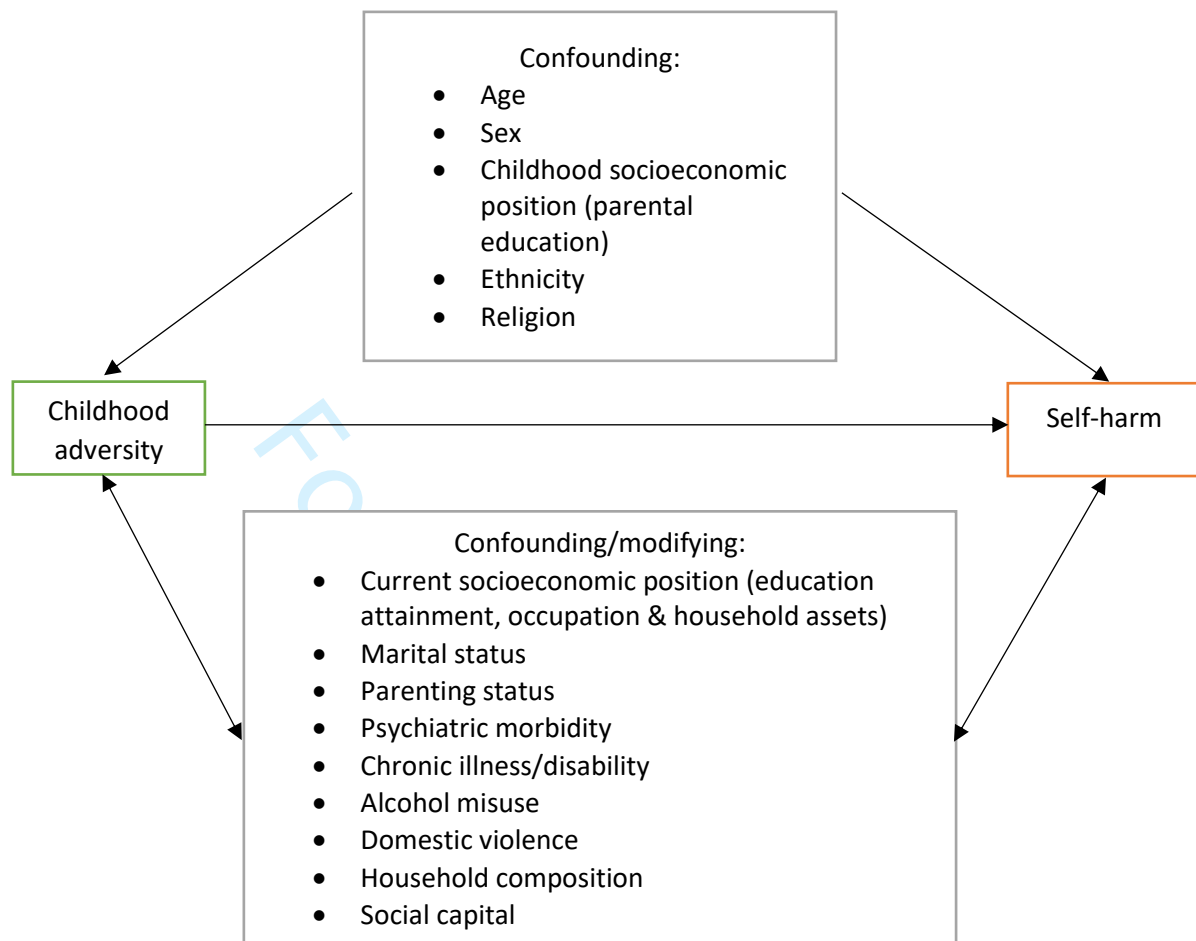

STROBE Statement—Checklist of items that should be included in reports of *case-control studies*

|                              | Item No | Recommendation                                                                                                                                                                                    | Page No |
|------------------------------|---------|---------------------------------------------------------------------------------------------------------------------------------------------------------------------------------------------------|---------|
| <b>Title and abstract</b>    | 1       | (a) Indicate the study's design with a commonly used term in the title or the abstract                                                                                                            | 1       |
|                              |         | (b) Provide in the abstract an informative and balanced summary of what was done and what was found                                                                                               | 2       |
| <b>Introduction</b>          |         |                                                                                                                                                                                                   |         |
| Background/rationale         | 2       | Explain the scientific background and rationale for the investigation being reported                                                                                                              | 3       |
| Objectives                   | 3       | State specific objectives, including any prespecified hypotheses                                                                                                                                  | 3       |
| <b>Methods</b>               |         |                                                                                                                                                                                                   |         |
| Study design                 | 4       | Present key elements of study design early in the paper                                                                                                                                           | 3       |
| Setting                      | 5       | Describe the setting, locations, and relevant dates, including periods of recruitment, exposure, follow-up, and data collection                                                                   | 3, 4    |
| Participants                 | 6       | (a) Give the eligibility criteria, and the sources and methods of case ascertainment and control selection. Give the rationale for the choice of cases and controls                               | 4       |
|                              |         | (b) For matched studies, give matching criteria and the number of controls per case                                                                                                               | 4       |
| Variables                    | 7       | Clearly define all outcomes, exposures, predictors, potential confounders, and effect modifiers. Give diagnostic criteria, if applicable                                                          | 4,5     |
| Data sources/<br>measurement | 8*      | For each variable of interest, give sources of data and details of methods of assessment (measurement). Describe comparability of assessment methods if there is more than one group              | 4,5     |
| Bias                         | 9       | Describe any efforts to address potential sources of bias                                                                                                                                         | 4       |
| Study size                   | 10      | Explain how the study size was arrived at                                                                                                                                                         | 4       |
| Quantitative variables       | 11      | Explain how quantitative variables were handled in the analyses. If applicable, describe which groupings were chosen and why                                                                      | 6       |
| Statistical methods          | 12      | (a) Describe all statistical methods, including those used to control for confounding                                                                                                             | 6       |
|                              |         | (b) Describe any methods used to examine subgroups and interactions                                                                                                                               | 6       |
|                              |         | (c) Explain how missing data were addressed                                                                                                                                                       | N/A     |
|                              |         | (d) If applicable, explain how matching of cases and controls was addressed                                                                                                                       | 6       |
|                              |         | (e) Describe any sensitivity analyses                                                                                                                                                             | 6       |
| <b>Results</b>               |         |                                                                                                                                                                                                   |         |
| Participants                 | 13*     | (a) Report numbers of individuals at each stage of study—eg numbers potentially eligible, examined for eligibility, confirmed eligible, included in the study, completing follow-up, and analysed | N/A     |
|                              |         | (b) Give reasons for non-participation at each stage                                                                                                                                              | N/A     |
|                              |         | (c) Consider use of a flow diagram                                                                                                                                                                | N/A     |
| Descriptive data             | 14*     | (a) Give characteristics of study participants (eg demographic, clinical, social) and information on exposures and potential confounders                                                          | N/A     |
|                              |         | (b) Indicate number of participants with missing data for each variable of interest                                                                                                               | N/A     |
| Outcome data                 | 15*     | Report numbers in each exposure category, or summary measures of exposure                                                                                                                         | N/A     |

|    |                          |    |                                                                                                                                                                                                              |
|----|--------------------------|----|--------------------------------------------------------------------------------------------------------------------------------------------------------------------------------------------------------------|
| 1  |                          |    |                                                                                                                                                                                                              |
| 2  |                          |    |                                                                                                                                                                                                              |
| 3  | Main results             | 16 | (a) Give unadjusted estimates and, if applicable, confounder-adjusted estimates and their precision (eg, 95% confidence interval). Make clear which confounders were adjusted for and why they were included |
| 4  |                          |    | N/A                                                                                                                                                                                                          |
| 5  |                          |    |                                                                                                                                                                                                              |
| 6  |                          |    |                                                                                                                                                                                                              |
| 7  |                          |    | (b) Report category boundaries when continuous variables were categorized                                                                                                                                    |
| 8  |                          |    | N/A                                                                                                                                                                                                          |
| 9  |                          |    | (c) If relevant, consider translating estimates of relative risk into absolute risk for a meaningful time period                                                                                             |
| 10 |                          |    | N/A                                                                                                                                                                                                          |
| 11 | Other analyses           | 17 | Report other analyses done—eg analyses of subgroups and interactions, and sensitivity analyses                                                                                                               |
| 12 |                          |    | N/A                                                                                                                                                                                                          |
| 13 |                          |    |                                                                                                                                                                                                              |
| 14 |                          |    |                                                                                                                                                                                                              |
| 15 | <b>Discussion</b>        |    |                                                                                                                                                                                                              |
| 16 | Key results              | 18 | Summarise key results with reference to study objectives                                                                                                                                                     |
| 17 |                          |    | N/A                                                                                                                                                                                                          |
| 18 | Limitations              | 19 | Discuss limitations of the study, taking into account sources of potential bias or imprecision. Discuss both direction and magnitude of any potential bias                                                   |
| 19 |                          |    | N/A                                                                                                                                                                                                          |
| 20 | Interpretation           | 20 | Give a cautious overall interpretation of results considering objectives, limitations, multiplicity of analyses, results from similar studies, and other relevant evidence                                   |
| 21 |                          |    | N/A                                                                                                                                                                                                          |
| 22 | Generalisability         | 21 | Discuss the generalisability (external validity) of the study results                                                                                                                                        |
| 23 |                          |    | N/A                                                                                                                                                                                                          |
| 24 | <b>Other information</b> |    |                                                                                                                                                                                                              |
| 25 | Funding                  | 22 | Give the source of funding and the role of the funders for the present study and, if applicable, for the original study on which the present article is based                                                |
| 26 |                          |    | 7                                                                                                                                                                                                            |
| 27 |                          |    |                                                                                                                                                                                                              |
| 28 |                          |    |                                                                                                                                                                                                              |

\*Give information separately for cases and controls.

**Note:** An Explanation and Elaboration article discusses each checklist item and gives methodological background and published examples of transparent reporting. The STROBE checklist is best used in conjunction with this article (freely available on the Web sites of PLoS Medicine at <http://www.plosmedicine.org/>, Annals of Internal Medicine at <http://www.annals.org/>, and Epidemiology at <http://www.epidem.com/>). Information on the STROBE Initiative is available at <http://www.strobe-statement.org>.
